# Supplementary material for: Scalable colloidal synthesis of uniform Bi2S3nanorods as sensitive materials for visible-light photodetectors
Source: Royal Society of Chemistry journal article supplement (doi:10.1039/c6ce01879c), 2016-12-22
Supplement: c6ce01879c1.pdf [file c6ce01879c1.pdf]

## Supplementary information

### Scalable Colloidal Synthesis of Uniform $\text{Bi}_2\text{S}_3$ Nanorods as Sensitive Material for Visible-Light Photodetectors

Huan Yu,<sup>a</sup> Junli Wang,<sup>\*a</sup> Tingting Wang,<sup>a</sup> Hongsong Yu,<sup>a</sup> Juan Yang,<sup>a</sup> Guiwu Liu,<sup>a</sup> Guanjun Qiao,<sup>a</sup> Qing Yang<sup>\*b</sup> and Xiaonong Cheng<sup>\*a</sup>

<sup>a</sup>School of Materials Science and Engineering, Jiangsu University, Zhenjiang 212013, P. R. China

<sup>b</sup>Hefei National Laboratory for Physical Sciences at Microscale and Department of Chemistry, University of Science and Technology of China (USTC), Hefei 230026, P. R. China

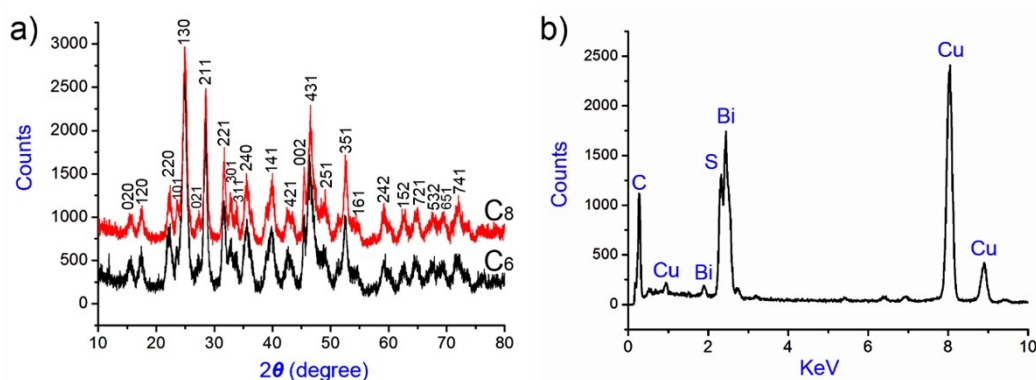

**Fig. S1** a) XRD results of  $\text{Bi}_2\text{S}_3$  nanorods prepared using OLA mixed with octylamine ( $\text{C}_8$ ) and hexylamine ( $\text{C}_6$ ); b) EDS spectrum of  $\text{Bi}_2\text{S}_3$  nanorods.

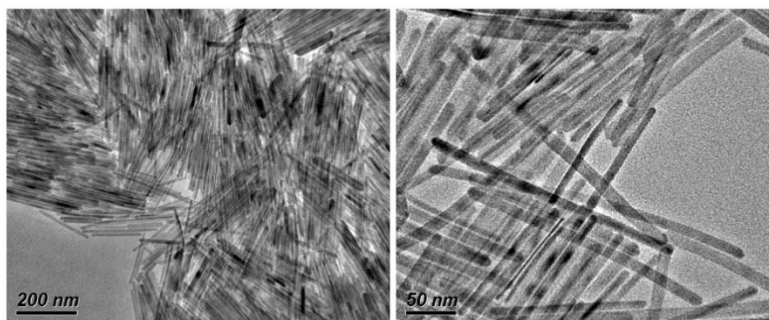

**Fig. S2** TEM images of  $\text{Bi}_2\text{S}_3$  nanorods prepared at 200 °C for 1 h in OLA mixed with dodecylamine ( $\text{C}_{12}$ ).

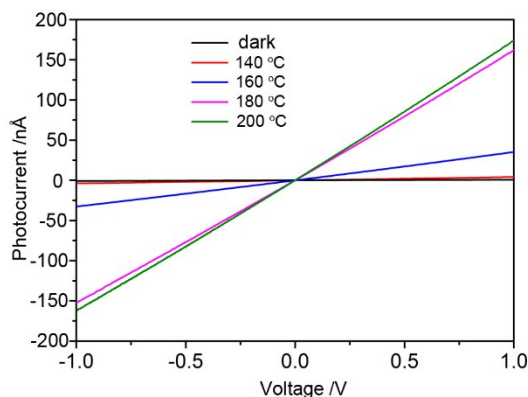

**Fig. S3** I-V curves under the dark and white light for  $\text{Bi}_2\text{S}_3$  nanorods prepared in the mixture of oleylamine and dodecylamine ( $\text{C}_{12}$ ) at 140, 160, 180 and 200 °C.
